# Supplementary material for: Similarities in the Behavior of Transcription Factors in Young Oil Palm (<em>Elaeis guineensis </em>Jacq.) Plants under Salt or Water Stress Provide Strategies to Develop Stress-Tolerant Oil Palm Plants at Once
Source: Preprints.org preprint supplement (doi:10.20944/preprints202307.0578.v1), 2023-07-10
Supplement: Supplementary file 1 [file supplementary]

## Sheet: Salgado et al_STable 1A
Supplementary Table 1a: Annotation of drought stress-responsive transcription factors in oil palm leaves using the Ghostkoala tool.
ko03000 Transcription factors (36)	Name	Definition	ID
K14431	TGA	transcription factor TGA	XP_010922090.2	XP_010928841.1
K09060	GBF	plant G-box-binding factor	XP_010936949.1	XP_019701388.2
K16241	HY5	transcription factor HY5	XP_010914801.1	XP_010914895.1
K14432	ABF	ABA responsive element binding factor	XP_019701456.1	XP_029122533.1
K20557	VIP1	transcription factor VIP1	XP_010912402.1	XP_010931001.1
K16189	PIF4	phytochrome-interacting factor 4	XP_010906815.1
K13422	MYC2	transcription factor MYC2	XP_010933462.1
K09191	GTF3A	general transcription factor IIIA	XP_010931909.1
K07466	RFA1, RPA1, rpa	replication factor A1	XP_010920581.1	XP_029123744.1
K00558	DNMT1, dcm	DNA (cytosine-5)-methyltransferase 1	XP_010936992.1
K12236	NFX1	transcriptional repressor NF-X1	XP_029117298.1
K09250	CNBP	cellular nucleic acid-binding protein	XP_019706187.1
K09377	CSRP	cysteine and glycine-rich protein	XP_010913501.1	XP_010928941.1	XP_010938994.1	XP_010942770.1
K09338	HD-ZIP	homeobox-leucine zipper protein	XP_010913582.1	XP_010917267.1	XP_010919351.1	XP_010923678.1	XP_010926222.1	XP_010926338.1	XP_010933626.2	XP_010933776.1
			XP_010934651.1	XP_010936202.1	XP_010939328.1	XP_010939547.1	XP_010939701.1	XP_010942613.1	XP_010943164.1	XP_019708739.1
			XP_019709326.1
K04683	TFDP1	transcription factor Dp-1	XP_010943404.1
K09419	HSFF	heat shock transcription factor	XP_010908034.1	XP_010912232.1	XP_010915439.1	XP_010919270.1	XP_010939421.1	XP_010943066.1	XP_019702683.1
K09422	MYBP	transcription factor MYB, plant	XP_010904805.1	XP_010906239.1	XP_010909695.1	XP_010910804.1	XP_010911363.1	XP_010911569.1	XP_010911701.1	XP_010913633.1
			XP_010914654.1	XP_010914802.1	XP_010915396.1	XP_010915677.1	XP_010916352.1	XP_010917650.1	XP_010919667.1	XP_010920127.1
			XP_010921398.3	XP_010921536.1	XP_010922881.1	XP_010922900.1	XP_010923441.1	XP_010926024.1	XP_010926549.1	XP_010929682.2
			XP_010931159.1	XP_010931451.1	XP_010932583.1	XP_010933337.1	XP_010933430.1	XP_010933448.1	XP_010935101.1	XP_010935898.1
			XP_010936298.1	XP_010936941.1	XP_010936942.1	XP_010937203.1	XP_010938192.1	XP_010938925.1	XP_010939500.1	XP_010939829.1
			XP_010941310.1	XP_010941964.2	XP_010943399.1	XP_010943505.1	XP_029117344.1	XP_029123914.1
K12133	LHY	MYB-related transcription factor LHY	XP_010934912.2
K08065	NFYB, HAP3	nuclear transcription Y subunit beta	XP_010937038.1	XP_010938445.1	XP_010939223.1	XP_029123682.1
K08066	NFYC, HAP5	nuclear transcription factor Y, gamma	NP_001306836.1	XP_010913291.1	XP_010941677.1
K04681	RBL1	retinoblastoma-like protein 1	XP_010908926.1
K16221	TCP21, CHE	transcription factor TCP21	XP_010918406.1
K09284	AP2	AP2-like factor, euAP2 lineage	XP_010907513.1	XP_010922496.1	XP_010928347.1
K09285	OVM, ANT	AP2-like factor, ANT lineage	XP_010914036.1	XP_010938537.1	XP_010939358.1
K09286	EREBP	EREBP-like factor	XP_010906563.1	XP_010912162.1	XP_010914492.1	XP_010916895.1	XP_010917392.1	XP_010921623.1	XP_010925113.1	XP_010926272.1
			XP_010928345.2	XP_010928933.1	XP_010931685.3	XP_010932347.1	XP_010932878.1	XP_010934650.1	XP_010937274.1	XP_010938373.1
			XP_010939626.1	XP_029123870.1
K14516	ERF1	ethylene-responsive transcription factor 1	XP_010904582.1	XP_010918804.1
K13433	PTI5	pathogenesis-related genes transcriptional activator PTI5	XP_010924385.1	XP_029121092.1
K13434	PTI6	pathogenesis-related genes transcriptional activator PTI6	XP_010931387.1
K09287	RAV	RAV-like factor	XP_010916479.1
K13425	WRKY22	WRKY transcription factor 22	XP_010915790.1	XP_010924759.1
K13424	WRKY33	WRKY transcription factor 33	XP_010921056.1	XP_010931316.3	XP_010937966.1
K21994	LBD18	LOB domain-containing protein 18	XP_010906049.1
K21596	CAMTA	calmodulin-binding transcription activator	XP_019706318.1
K22145	TMEM18	transmembrane protein 18	XP_010911887.1
K21772	PURA	transcriptional activator protein Pur-alpha	XP_010922876.1
K14514	EIN3	ethylene-insensitive protein 3	XP_010926635.1	XP_010931518.1	XP_010943685.1

## Sheet: Salgado et al_STable 1B
Supplementary Table 1b: Annotation of salt stress-responsive transcription factors in oil palm leaves using the ghostkoala tool
ko03000 Transcription factors (19)	Name	Definition	ID
K14431	TGA	transcription factor TGA	XP_019701724.2
K09060	GBF	plant G-box-binding factor	XP_010936949.1
K08065	NFYB, HAP3	nuclear transcription Y subunit beta	XP_010939223.1	XP_029123682.1
K08066	NFYC, HAP5	nuclear transcription factor Y, gamma	NP_001306836.1
K09191	GTF3A	general transcription factor IIIA	XP_010931909.1
K09285	OVM, ANT	AP2-like factor, ANT lineage	XP_010914036.1	XP_010938537.1
K09286	EREBP	EREBP-like factor	XP_010906563.1	XP_010919711.1	XP_010925113.1	XP_010926272.1	XP_010928245.1	XP_010928345.2	XP_010931685.3	XP_010937274.1
			XP_019701504.1
K09287	RAV	RAV-like factor	XP_010923453.1	XP_010926493.1
K09338	HD-ZIP	homeobox-leucine zipper protein	XP_010913582.1	XP_010926338.1	XP_010933626.2	XP_010942613.1	XP_019708739.1
K09419	HSFF	heat shock transcription factor, other eukaryote	XP_010912232.1	XP_010915439.1	XP_019702683.1
K09422	MYBP	transcription factor MYB, plant	XP_010904805.1	XP_010906239.1	XP_010910804.1	XP_010910907.1	XP_010915677.1	XP_010916352.1	XP_010920127.1	XP_010920699.2
			XP_010925547.1	XP_010926024.1	XP_010926054.1	XP_010926549.1	XP_010932431.1	XP_010932583.1	XP_010933430.1	XP_010935898.1
			XP_010936941.1	XP_010936942.1	XP_010939500.1	XP_010939814.1	XP_010943207.1	XP_010943691.1	XP_029123914.1
K12133	LHY	MYB-related transcription factor LHY	XP_010934912.2	XP_010941176.2	XP_019709666.1
K13433	PTI5	pathogenesis-related genes transcriptional activator PTI5	XP_029121092.1
K14432	ABF	ABA responsive element binding factor	XP_010907998.1	XP_010931491.1
K14516	ERF1	ethylene-responsive transcription factor 1	XP_010918804.1
K16221	TCP21, CHE	transcription factor TCP21	XP_010935558.1
K16241	HY5	transcription factor HY5	XP_019703612.1
K21596	CAMTA	calmodulin-binding transcription activator	XP_010938166.1
K09313	CUTL	homeobox proteína cut-like	XP_010926138.1
